# Supplementary material
Source: HighWire-hosted journal article supplement (https://cmaj.ca/highwire/filestream/58523/field_highwire_adjunct_files/0/image-henri-1-at.pdf)

**Appendix 1: Brain magnetic resonance images of a 52-year-old woman with delayed radiation-induced leukoencephalopathy. Two representative axial fluid attenuation inversion recovery sequences at the level of the lateral ventricles (left) and the centrum semiovale (right) demonstrate moderate–severe generalized cortical and subcortical atrophy with ex-vacuo dilatation of the ventricles and the cortical sulci. Postoperative changes (arrowheads) are seen in the right frontal lobe. Confluent areas of pathologic  $T_2$  signal changes (arrows) are seen in the white matter of the periventricular zones and centrum semiovale, in both hemispheres.**

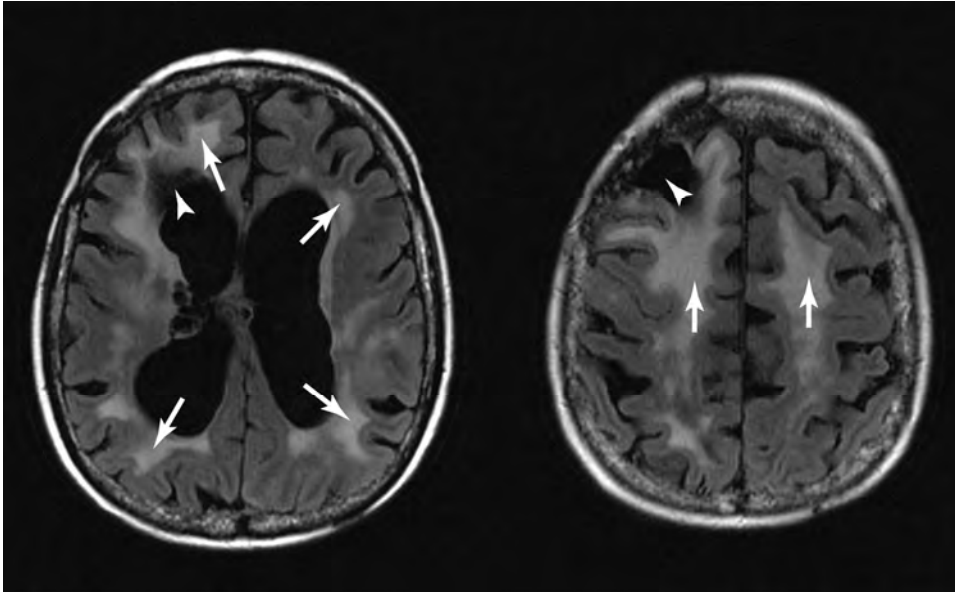

Supplement: image-henri-1-at.pdf [file image-henri-1-at.pdf]
